# Supplementary material for: Nano-lipids based on Ginger Oil and Lecithin as A Potential Drug Delivery System
Source: Preprints.org preprint supplement (doi:10.20944/preprints202206.0417.v1), 2022-06-30
Supplement: Supplementary file 1 [file supplementary]

# Nano-lipids based on ginger oil and lecithin as a potential drug delivery system

Hung Quach<sup>1</sup>, Tuong-Vi Le<sup>1</sup>, Thanh-Thuy Nguyen<sup>1,2</sup>, Phuong Nguyen<sup>3\*</sup>, Cuu Khoa Nguyen<sup>1,2\*</sup>, Le Hang Dang<sup>1,2\*</sup>

<sup>1</sup> Institute of Applied Materials Science, Vietnam Academy of Science and Technology, HCMC, Viet Nam; [qhung@iams.vast.vn](mailto:qhung@iams.vast.vn), [lvvi@iams.vast.vn](mailto:lvvi@iams.vast.vn); [dtlh@iams.vast.vn](mailto:dtlh@iams.vast.vn)

<sup>2</sup> Graduate University of Science and Technology, Vietnam Academy of Science and Technology, HCMC, Viet Nam; [ntthuy@iams.vast.vn](mailto:ntthuy@iams.vast.vn); [nckhoa@iams.vast.vn](mailto:nckhoa@iams.vast.vn)

<sup>3</sup> Faculty of Chemical Technology, HCMC University of Food Industry, Ho Chi Minh City, Viet Nam; [ntphuong@iams.vast.vn](mailto:ntphuong@iams.vast.vn)

\* Correspondence: [nckhoa@iams.vast.vn](mailto:nckhoa@iams.vast.vn) ; [ntphuong@iams.vast.vn](mailto:ntphuong@iams.vast.vn); [dtlh@iams.vast.vn](mailto:dtlh@iams.vast.vn)

## Supporting material

Table S1: Compounds identified by GC–MS using NIST-14 Mass Spectral library

Figure S1: GC chromatograms of ginger oil

Figure S2: Mass spectrum extracted from a peak 40.41 (A) and its fragmentation (B)

Figure S3: Mass spectrum extracted from a peak 41.45(A) and its fragmentation (B)

Figure S4: Mass spectrum extracted from a peak 43.88 (A) and its fragmentation (B)

Figure S5: Mass spectrum extracted from a peak 23.57 (A) and its fragmentation (B)

Figure S6: Standard curve of [6]-shogaol constructing by HPLC

Figure S7: The color of pyrogallol solution in the presentation of HEPES buffer, Ginger oil and GL nano-lipid

Figure S8: Zones of Inhibitions formed on nutrient agar surface by ginger oil, L nano-lipid, GL nano-lipid, and two positive controls (Ampicillin and Streptomycin) against *E.coli* (A) and *S.aureus* (B).

Figure S9: Hydrodynamic size value of Cur@ GL in PBS buffer and the EE values after 10 days stored at 25°C.

Figure S10: The confocal image of Cur@ GL

Figure S11: Release kinetics of Cur@ GL at pH 7.4 (A) and at pH 5.5 (B) fitted to 5 kinetic models constructing by KinetDS

Table S1: Compounds identified by GC–MS using NIST-14 Mass Spectral library

| Peak | R.T.   | Name of compound                    | Pct Total |
|------|--------|-------------------------------------|-----------|
| 1    | 23.584 | Geraniol                            | 1.949     |
| 2    | 37.032 | n.i                                 | 0.474     |
| 3    | 39.479 | n.i                                 | 1.378     |
| 4    | 40.138 | n.i                                 | 3.113     |
| 5    | 40.41  | (6)-Shogaol                         | 63.137    |
| 6    | 41.549 | [8]-Shogaol                         | 6.29      |
| 7    | 41.644 | n.i                                 | 5.09      |
| 8    | 42.449 | n.i                                 | 1.438     |
| 9    | 42.679 | n.i                                 | 5.671     |
| 10   | 43.871 | Geranyl oleate                      | 3.735     |
| 11   | 45.544 | [6]-Gingerdiol (2E)-geranial acetal | 7.726     |

Figure list

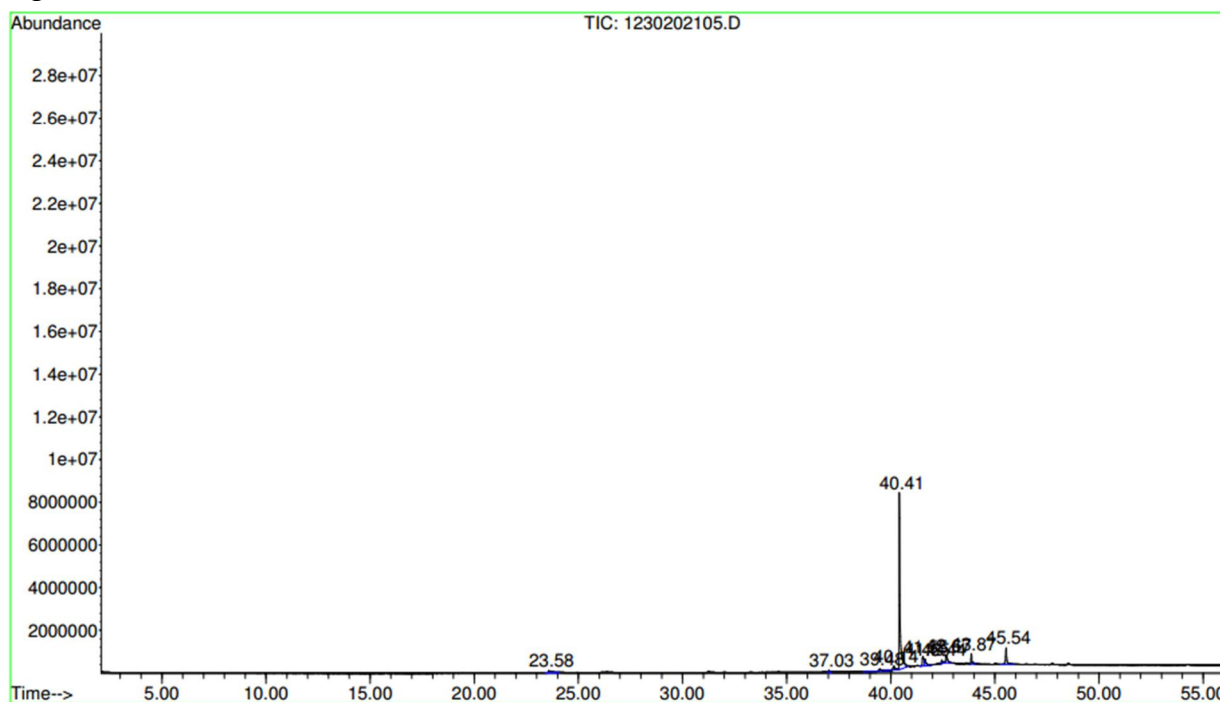

Figure S1: GC chromatograms of ginger oil

A) Hit 1 : 1-(4-Hydroxy-3-methoxyphenyl)dec-4-en-3-one  
 C<sub>17</sub>H<sub>24</sub>O<sub>3</sub>; MF: 932; RMF: 950; Prob 96.5%; CAS: 555-66-8; Lib: mainlib; ID: 124142.

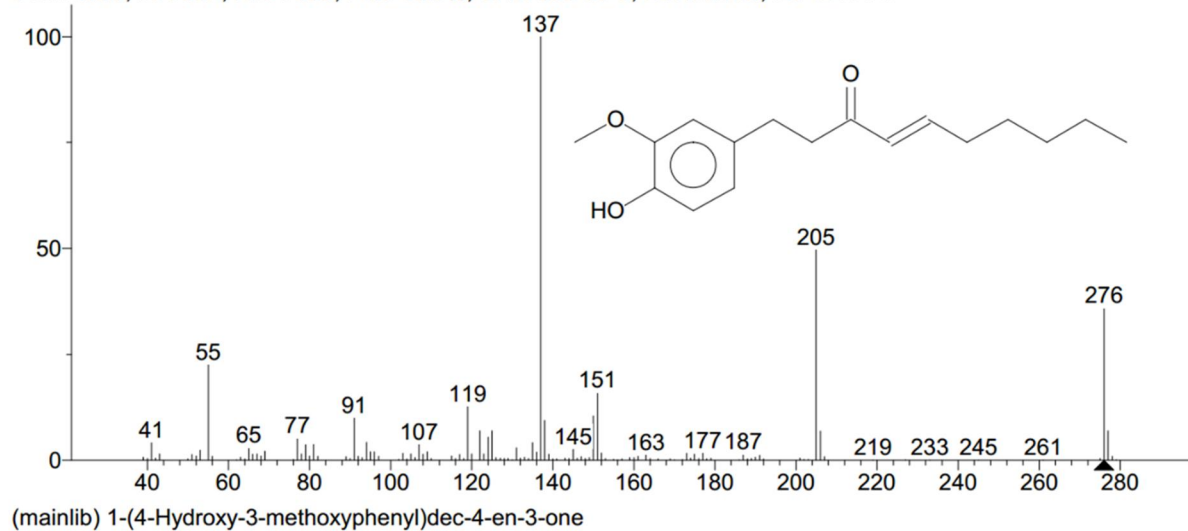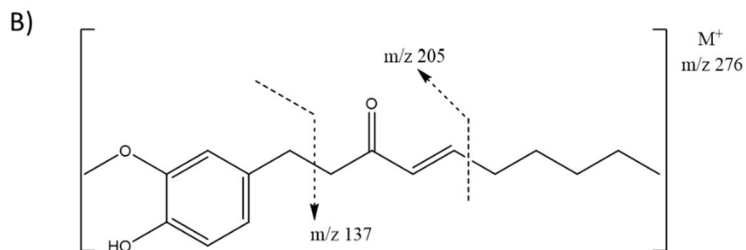

Figure S2: Mass spectrum extracted from a peak 40.41 (A) and its fragmentation (B)

A) Hit 1 : 1-(4-Hydroxy-3-methoxyphenyl)dodec-4-en-3-one  
 C<sub>19</sub>H<sub>28</sub>O<sub>3</sub>; MF: 654; RMF: 824; Prob 39.0%; CAS: 36700-45-5; Lib: mainlib; ID: 124143.

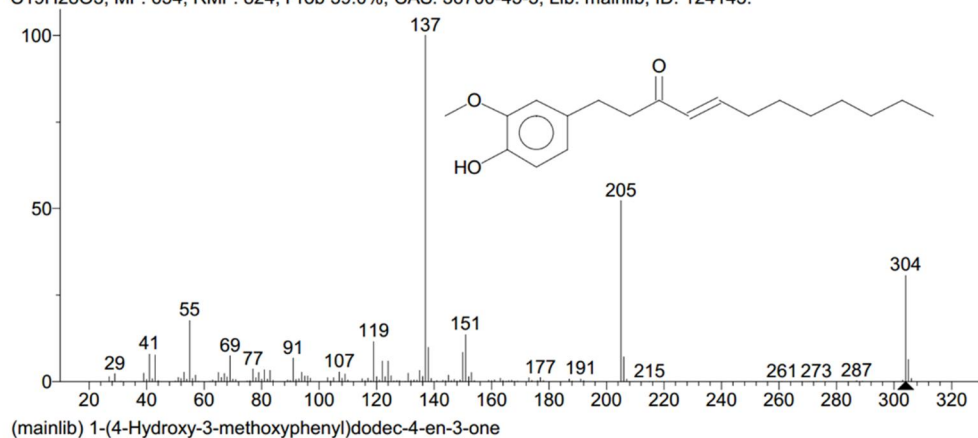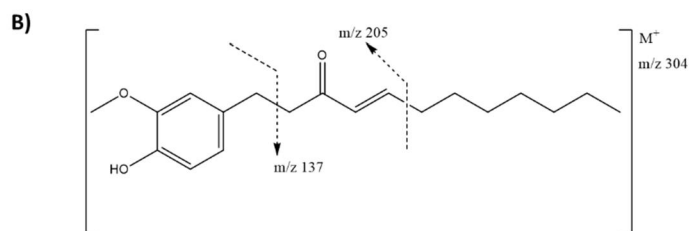

Figure S3: Mass spectrum extracted from a peak 41.45(A) and its fragmentation (B)

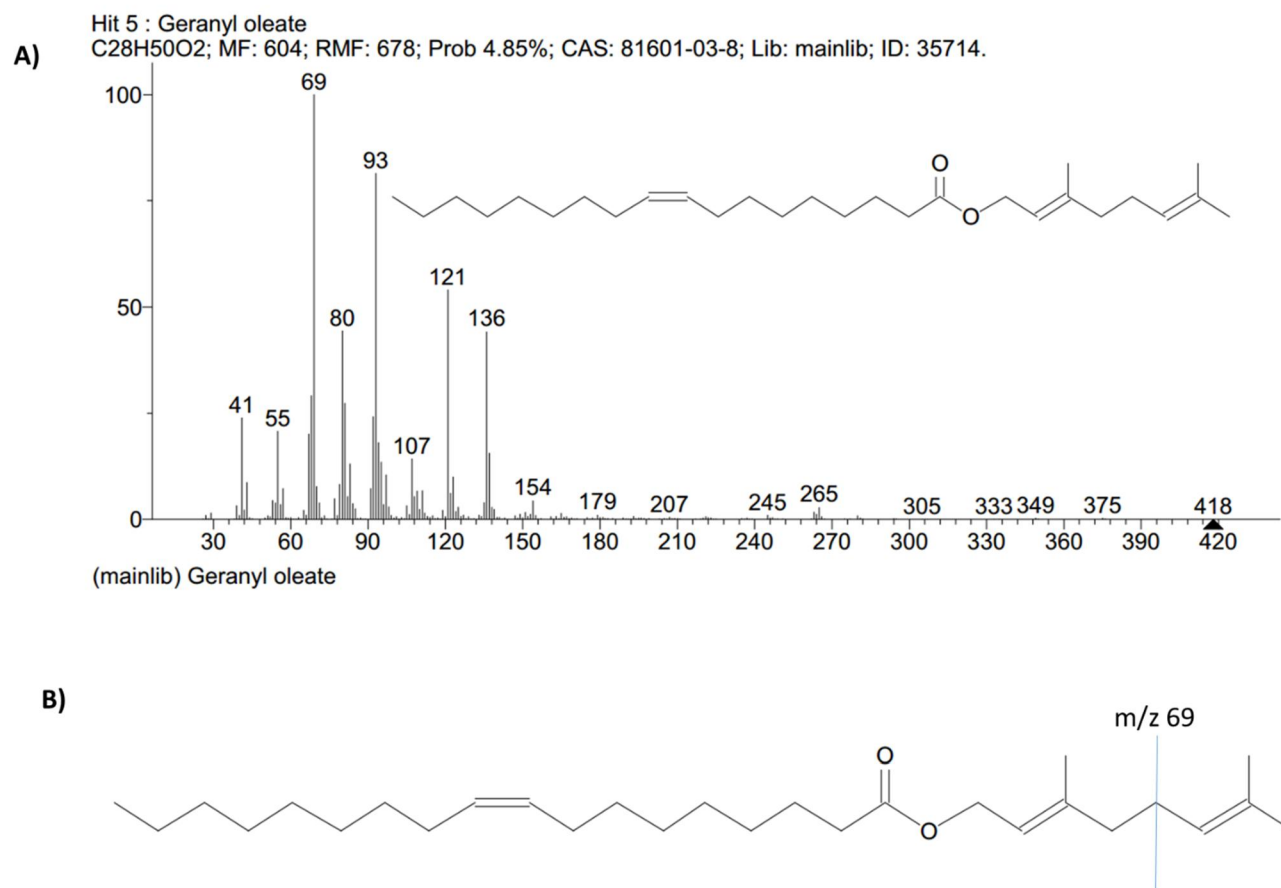

Figure S4: Mass spectrum extracted from a peak 43.88 (A) and its fragmentation (B)

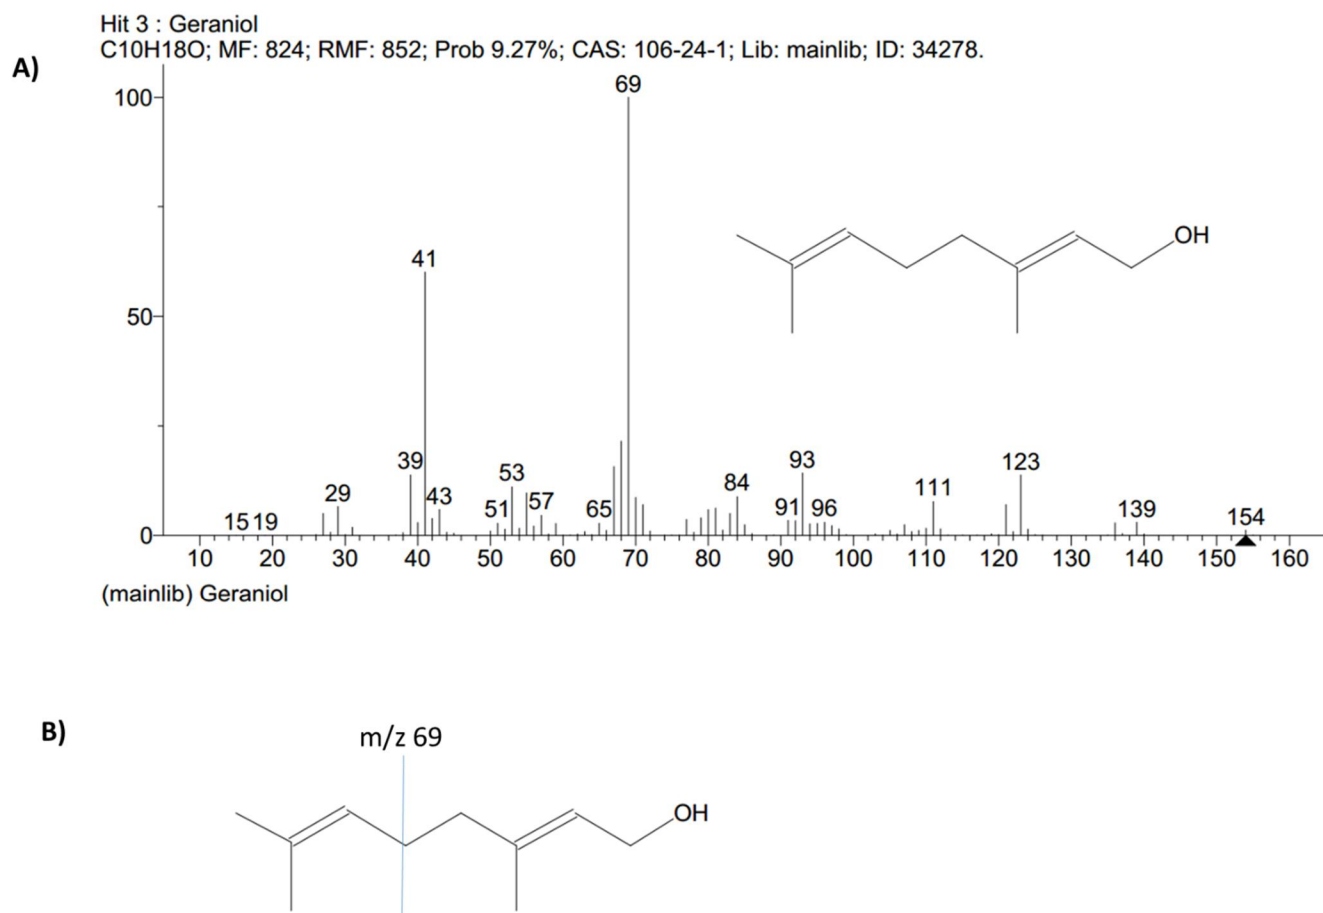

Figure S5: Mass spectrum extracted from a peak 23.57 (A) and its fragmentation (B)

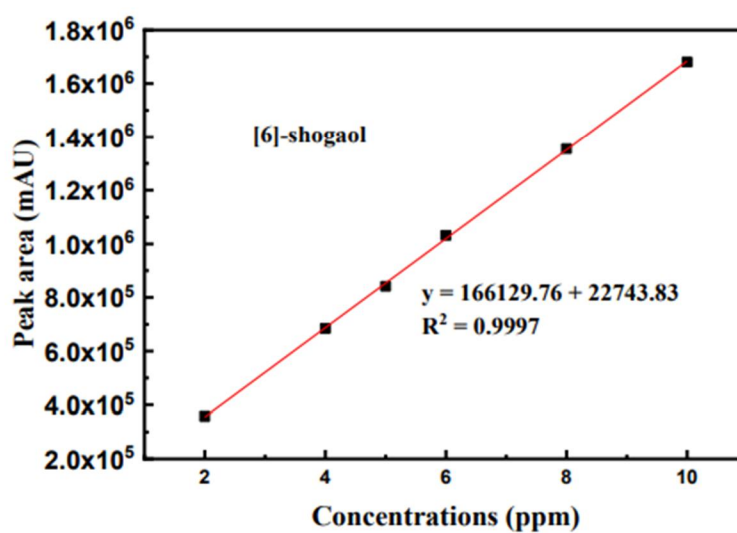

Figure S6: Standard curve of [6]-shogaol constructing by HPLC

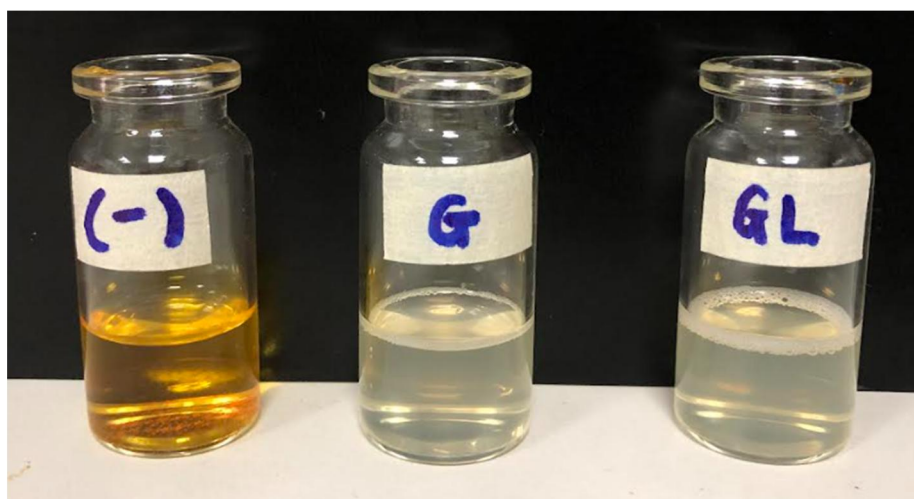

Figure S7: The color of pyrogallol solution in the presentation of HEPES buffer, Ginger oil and GL nano-lipid

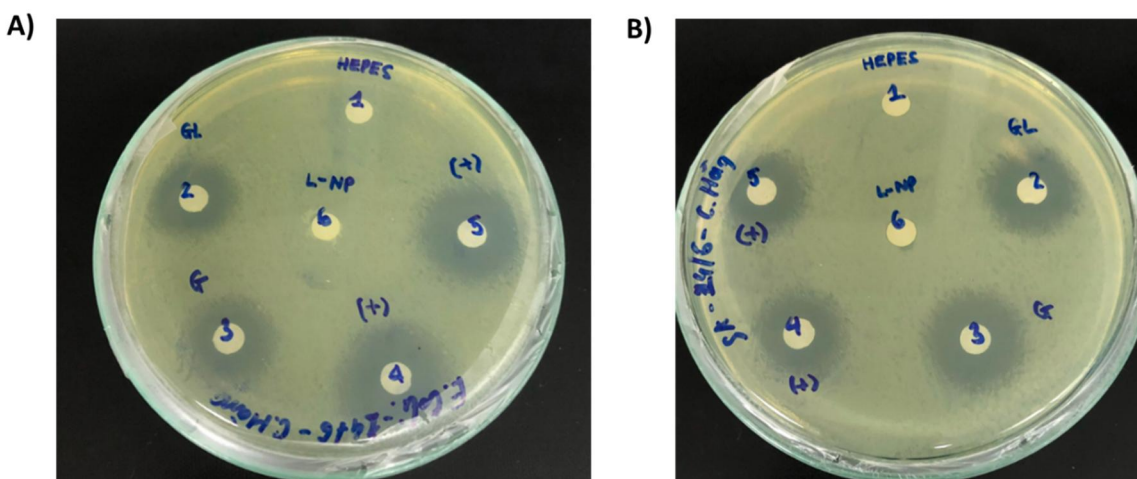

Figure S8: Zones of Inhibitions formed on nutrient agar surface by Hepes (1) GL nano-lipid (2), ginger oil (3), and two positive controls (Ampicillin (4) and Streptomycin(5)) L nano-lipid (6) against *E.coli* (A) and *S.aureus* (B).

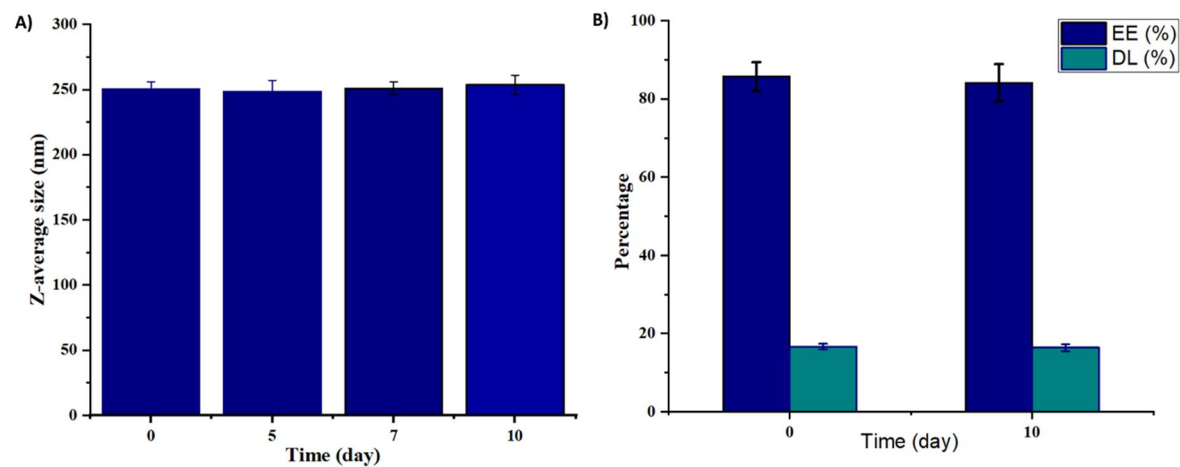

Figure S9: Hydrodynamic size value of Cur@ GL in PBS buffer (A) and the EE and DL values (B) after 10 days stored at 25°C.

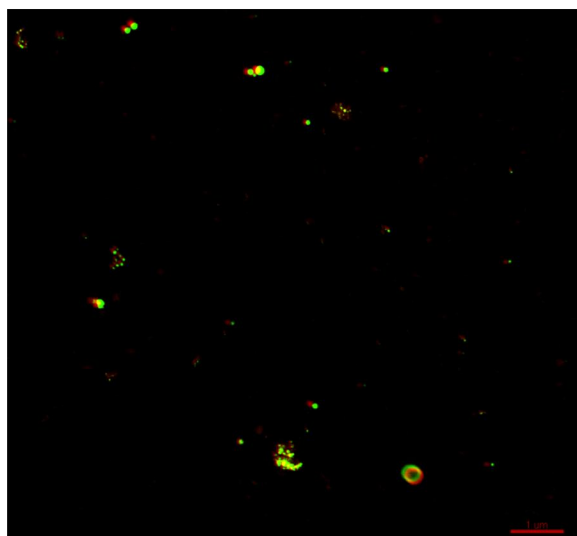

Figure S10: The confocal image of Cur@ GL



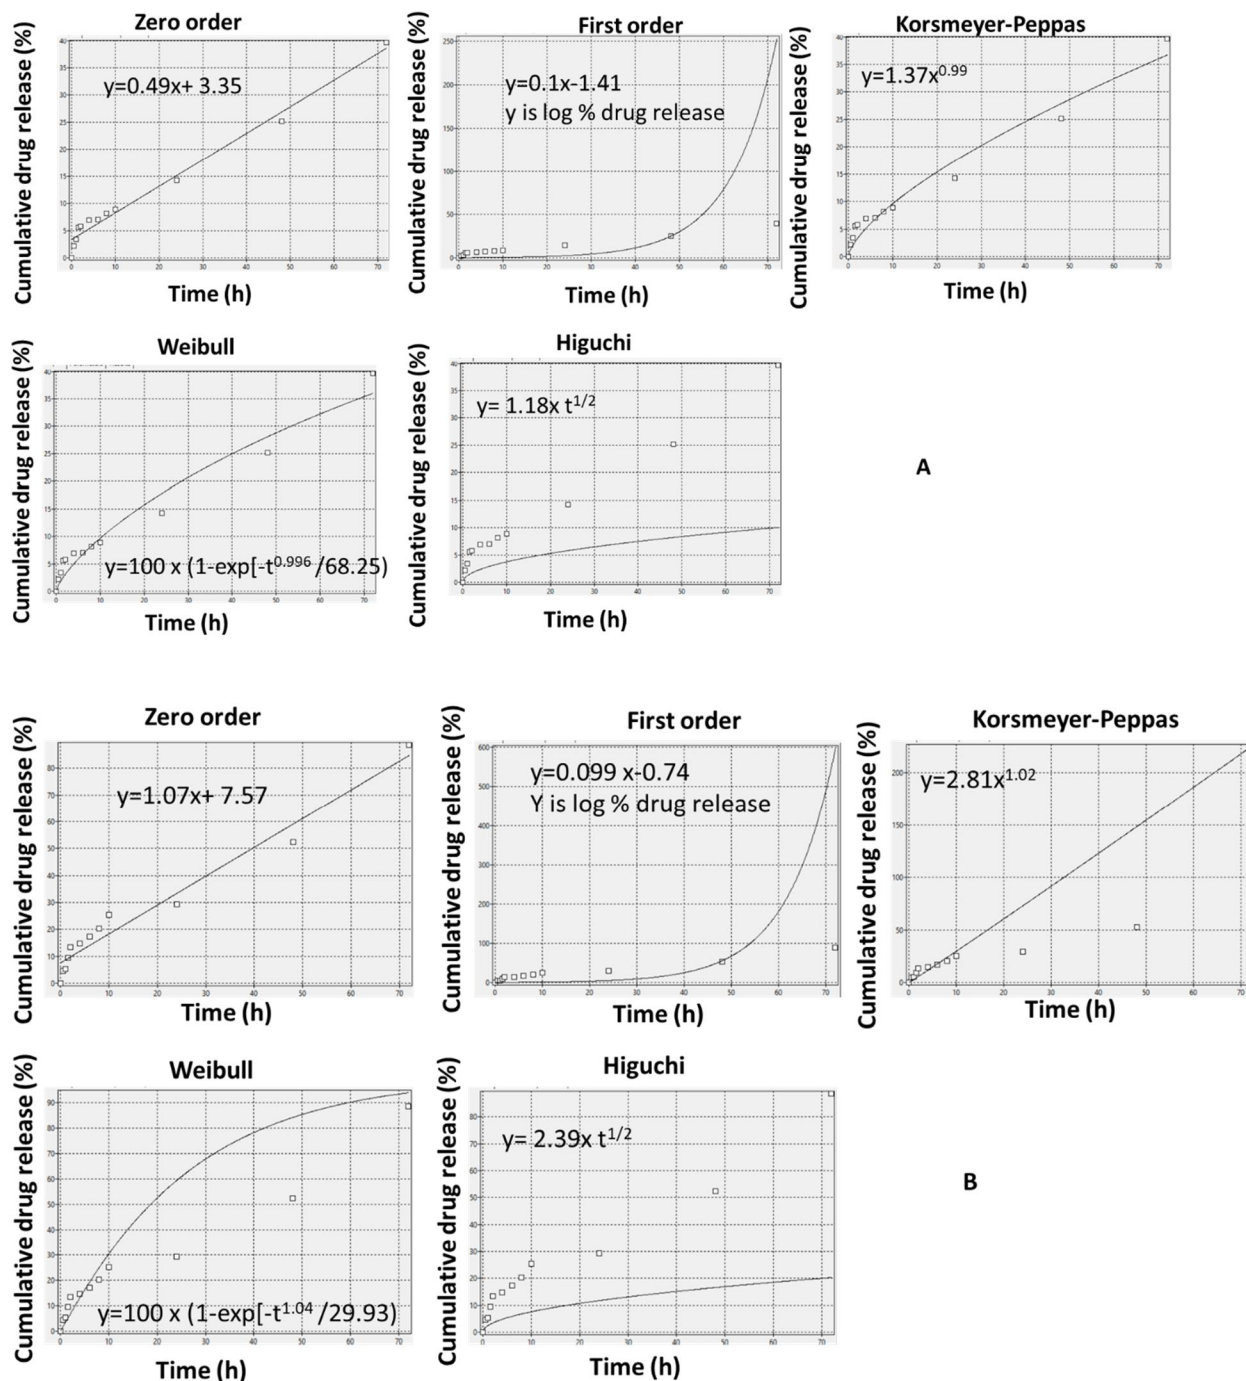

Figure S11: Release kinetics of Cur@ GL at pH 7.4 (A) and at pH 5.5 (B) fitted to 5 kinetic models constructing by KinetDS
